# Supplementary material for: Mechanisms of Compound Kushen Injection for the Treatment of Lung Cancer Based on Network Pharmacology
Source: Evid Based Complement Alternat Med. 2019 May 28;2019:4637839. doi: 10.1155/2019/4637839 (PMC6558614; doi:10.1155/2019/4637839)
Supplement: Supplementary Materials — contain four tables. Supplementary Table S1: information about the 16 compounds of Compound Kushen Injection. Supplementary Table S2: 97 targets related to LC. Supplementary Table S3: the information of 26 nodes in the PPI network of LC targets. Supplementary Table S4: 27 potential targets of CKI for treating LC. [file 4637839.f1.zip]

Archive with 5 entries (4 files):
- 4637839.f1/
- 4637839.f1/Table S1.docx
- 4637839.f1/Table S2.xlsx
- 4637839.f1/Table S3.xlsx
- 4637839.f1/Table S4.xlsx
