# Supplementary material for: Mechanisms of Compound Kushen Injection for the Treatment of Lung Cancer Based on Network Pharmacology
Source: Evid Based Complement Alternat Med. 2019 May 28;2019:4637839. doi: 10.1155/2019/4637839 (PMC6558614; doi:10.1155/2019/4637839)
Supplement: Supplementary Materials — contain four tables. Supplementary Table S1: information about the 16 compounds of Compound Kushen Injection. Supplementary Table S2: 97 targets related to LC. Supplementary Table S3: the information of 26 nodes in the PPI network of LC targets. Supplementary Table S4: 27 potential targets of CKI for treating LC. [file 4637839.f1.zip › 4637839.f1/Table S2.xlsx]

## Sheet: Sheet1
Table S2. 97 targets related to LC
Target	Source	Target	Source	Target	Source
WT1	TTD	MUC1	TTD	MMP7	TTD
TNFRSF10A	TTD	NFE2L2	TTD	MMP1	TTD
IL2RG	TTD	TLR1	TTD	MMP2	TTD
PDCD1	TTD	TLR2	TTD	CLU	TTD
S1PR1	TTD	TLR3	TTD	FLT4	TTD
BCL2L1	TTD	TLR4	TTD	TOP1	TTD
BCL2L2	TTD	TLR5	TTD	CDK4	TTD
HSPB3	TTD	TLR6	TTD	CEACAM5	TTD
HSPB1	TTD	TLR9	TTD	CDK2	TTD
PARP1	TTD	AXL	TTD	CDK9	TTD
ABL1	TTD	DNMT1	TTD	CDK1	TTD
TNFSF10	TTD	TUSC2	TTD	KDM1A	TTD
EPHB4	TTD	ERBB3	TTD	BCL2	TTD
HBA1	TTD	TPBG	TTD	HSP90B1	TTD
SSTR2	TTD	MAGEC2	TTD	FASLG	OMIM
IL2	TTD	BIRC5	TTD	CASP8	OMIM
TOP2	TTD	ITGB1	TTD	DLEC1	OMIM
P2RY2	TTD	MAGEC1	TTD	RASSF1	OMIM
TUBB1	TTD	CTAG1A	TTD	PIK3CA	OMIM
MET	TTD	ATM	TTD	IRF1	OMIM
LDLR	TTD	PREP	TTD	PRKN	OMIM
ALK	TTD	FNTB	TTD	EGFR	OMIM
ABCB1	TTD	PRKCA	TTD	BRAF	OMIM
DRD2	TTD	PDGFRA	TTD	MAP3K8	OMIM
IGF1R	TTD	CHEK1	TTD	ERCC6	OMIM
CD80	TTD	PTGS2	TTD	SLC22A1L	OMIM
KIT	TTD	MDM2	TTD	PPP2R1B	OMIM
MTOR	TTD	TGFB2	TTD	KRAS	OMIM
PDGFRB	TTD	EGFL7	TTD	ERBB2	OMIM
OPRM1	TTD	KDR	TTD	CYP2A6	OMIM
FLT1	TTD	MMP9	TTD	CHRNA5	OMIM
FGFR1	TTD	MMP12	TTD	CHRNA3	OMIM
ERBB4	TTD
