# Supplementary material for: Mechanisms of Compound Kushen Injection for the Treatment of Lung Cancer Based on Network Pharmacology
Source: Evid Based Complement Alternat Med. 2019 May 28;2019:4637839. doi: 10.1155/2019/4637839 (PMC6558614; doi:10.1155/2019/4637839)
Supplement: Supplementary Materials — contain four tables. Supplementary Table S1: information about the 16 compounds of Compound Kushen Injection. Supplementary Table S2: 97 targets related to LC. Supplementary Table S3: the information of 26 nodes in the PPI network of LC targets. Supplementary Table S4: 27 potential targets of CKI for treating LC. [file 4637839.f1.zip › 4637839.f1/Table S3.xlsx]

## Sheet: Sheet1
Table S3. The information of 26 nodes in the PPI network of LC targets.
Name	Degree	BetweennessCentrality	ClosenessCentrality
TP53	79	0.157976	0.625
PCNA	67	0.0572003	0.57508
CDK1	67	0.0230079	0.547112
CDK2	65	0.0260908	0.555556
CCNB1	61	0.016146	0.540541
PIK3CA	57	0.0685478	0.56962
AKT1	56	0.0868905	0.582524
CHEK1	50	0.0133135	0.514286
CDKN1B	49	0.0437871	0.547112
CDKN1A	49	0.0142696	0.537313
EGF	48	0.0421229	0.555556
VEGFA	46	0.051454	0.5625
BIRC5	46	0.0356723	0.550459
PIK3CB	46	0.0265682	0.542169
BCL2	43	0.0302168	0.54878
RB1	43	0.0178317	0.532544
CCND1	42	0.0208564	0.538922
MAD2L1	40	0.0149435	0.456853
EGFR	39	0.0376888	0.54878
PPP2CA	35	0.0344749	0.520231
ATM	35	0.013031	0.495868
MDM2	32	0.0145404	0.515759
PPP2R1B	31	0.0275433	0.512821
ABL1	29	0.0173988	0.512821
KITLG	28	0.0186585	0.486486
PARP1	25	0.014868	0.505618
