# Supplementary material for: Mechanisms of Compound Kushen Injection for the Treatment of Lung Cancer Based on Network Pharmacology
Source: Evid Based Complement Alternat Med. 2019 May 28;2019:4637839. doi: 10.1155/2019/4637839 (PMC6558614; doi:10.1155/2019/4637839)
Supplement: Supplementary Materials — contain four tables. Supplementary Table S1: information about the 16 compounds of Compound Kushen Injection. Supplementary Table S2: 97 targets related to LC. Supplementary Table S3: the information of 26 nodes in the PPI network of LC targets. Supplementary Table S4: 27 potential targets of CKI for treating LC. [file 4637839.f1.zip › 4637839.f1/Table S4.xlsx]

## Sheet: Sheet1
Table S4. 27 potential targets of CKI for treating LC
Name	Degree	BetweennessCentrality	ClosenessCentrality
CHRNA3	6	0.401612	0.275362
PRKCA	3	0.103841	0.306452
DRD2	3	0.102892	0.191919
MMP9	2	0.443812	0.365385
CDK1	2	0.0938834	0.316667
MMP1	2	0.14936	0.311475
CDK2	2	0.0938834	0.316667
CHRNA5	2	0.00047416	0.188119
CCND1	1	0	0.24359
TLR4	1	0	0.197917
TLR2	1	0	0.197917
EGFR	1	0	0.296875
IGF1R	1	0	0.296875
MMP2	1	0	0.296875
ERBB2	1	0	0.296875
ERBB4	1	0	0.296875
AKT1	1	0	0.296875
AURKB	1	0	0.296875
BRAF	1	0	0.296875
MAP2K1	1	0	0.296875
NFE2L2	1	0	0.296875
PIK3CA	1	0	0.296875
CCNE1	1	0	0.296875
CDK4	1	0	0.204301
CDK3	1	0	0.204301
CDK6	1	0	0.204301
OPRM1	1	0	0.140741
